# Supplementary material for: The design and testing of mini-barcode markers in marine lobsters
Source: PubMed Central journal article supplement (PMC6345471; doi:10.1371/journal.pone.0210492), 2019-01-24
Supplement: pone.0210492.s002.pdf [file pone.0210492.s002.pdf]

**S2 Table. Primer information table for the standard COI region, universal mini-barcode, internal COI mini-barcode and lobster mini-barcode.**

| <b>Primers</b>                   | <b>Forward</b>             | <b>Reverse</b>             | <b>Expected size</b> |
|----------------------------------|----------------------------|----------------------------|----------------------|
| <b>Standard COI</b>              | LCO1490 5'- GGTCAACAAATCAT | HCO2198 5'- TAAACTTCAGGGTG | 658 bp               |
|                                  | AAAGATATTGG-3'             | ACCAAAAAATCA-3'            |                      |
| <b>Universal mini-barcode</b>    | UniMinibarF1 ' -           | UniMinibarR1 5'-           | 130 bp               |
|                                  | TCCACTAATCACAARGATATTG     | GAAAATCATAATGAAGGCATGA     |                      |
|                                  | GTAC-3'                    | GC-3'                      |                      |
| <b>Internal COI mini-barcode</b> | mlCOIintF 5'-              | mlCOIintR 5'-              | 313 – 319 bp         |
|                                  | GGWACWGGWTGAACWGTWTA       | GGRGGRTASACSGTTCASCCSGT    |                      |
|                                  | YCCYCC-3'                  | SCC-3''                    |                      |
| <b>Lobster mini-barcode</b>      | LobsterMinibarF 5'-        | LobsterMinibarR 5'-        | 230 bp               |
|                                  | GGWGATGAYCAAATTTAYAAGT     | CCWACTCCTCTTTCTACTATTCC    |                      |
|                                  | -3'                        | -3'                        |                      |
