# Supplementary material for: The design and testing of mini-barcode markers in marine lobsters
Source: PubMed Central journal article supplement (PMC6345471; doi:10.1371/journal.pone.0210492), 2019-01-24
Supplement: pone.0210492.s003.pdf [file pone.0210492.s003.pdf]

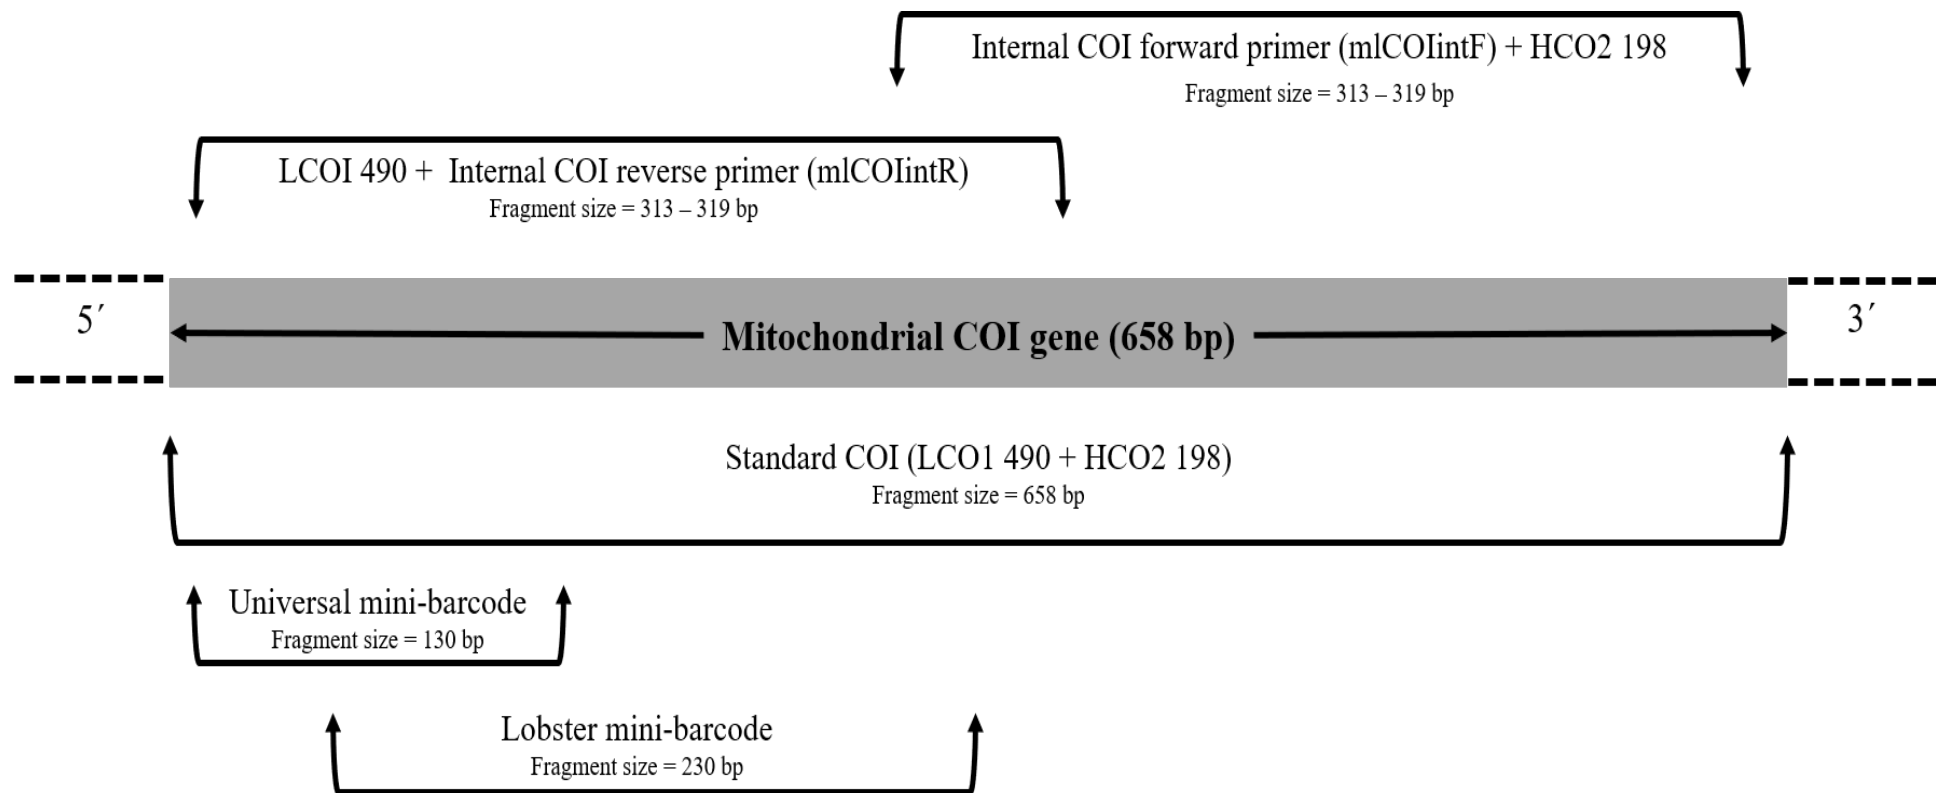

**S3 Fig. A graphical representation of the relative annealing sites and orientation of the different primer sets on the COI barcode region.**
