# Supplementary material for: The design and testing of mini-barcode markers in marine lobsters
Source: PubMed Central journal article supplement (PMC6345471; doi:10.1371/journal.pone.0210492), 2019-01-24
Supplement: pone.0210492.s004.pdf [file pone.0210492.s004.pdf]

**S4 Table: Thermal cycling conditions for the standard COI, universal mini-barcode (touch up PCR), internal COI mini-barcode (touch down PCR) primers and lobster mini-barcode.**

|                             | Standard COI |     |     | Universal mini-barcode<br>(touch up) |     |      | Internal COI mini-<br>barcode (touch down) |       |      | Lobster mini-barcode |     |      |
|-----------------------------|--------------|-----|-----|--------------------------------------|-----|------|--------------------------------------------|-------|------|----------------------|-----|------|
|                             | Cycles       | ° C | Min | Cycles                               | ° C | Min  | Cycles                                     | ° C   | Min  | Cycles               | ° C | Min  |
| <b>Initial denaturation</b> |              | 94  | 2   |                                      | 94  | 2    |                                            | 94    | 2    |                      | 94  | 2    |
| <b>Denaturation</b>         |              | 94  | 1   |                                      | 94  | 1    |                                            | 94    | 10 s |                      | 94  | 30 s |
| <b>Annealing</b>            | x 35         | 40  | 1   | x 5                                  | 46  | 1    | x 16                                       | 62 ** | 30 s | x 35                 | 46  | 30 s |
| <b>Extension</b>            |              | 72  | 1.5 |                                      | 72  | 30 s |                                            | 72    | 1    |                      | 68  | 1    |
| <b>Denaturation</b>         |              | -   | -   |                                      | 94  | 1    |                                            | 94    | 10 s |                      | -   | -    |
| <b>Annealing</b>            | -            | -   | -   | x 35                                 | 53  | 1    | x 25                                       | 46    | 30 s | -                    | -   | -    |
| <b>Extension</b>            |              | -   | -   |                                      | 72  | 30 s |                                            | 72    | 1    |                      | -   | -    |
| <b>Final extension</b>      |              | 72  | 7   |                                      | 72  | 5    |                                            | 72    | 5    |                      | 68  | 5    |

\*\* Temperature (-1°C per cycle = touch down PCR)
