# Supplementary material for: The design and testing of mini-barcode markers in marine lobsters
Source: PubMed Central journal article supplement (PMC6345471; doi:10.1371/journal.pone.0210492), 2019-01-24
Supplement: pone.0210492.s005.pdf [file pone.0210492.s005.pdf]

**S5 Table. Summary statistics of the sliding window analysis for two selected fragments of each fragment length, showing potential segments for mini-barcodes and their position within the full alignment. Statistics include mean Kimura 2-parameter (K2P) distance, proportion of zero non-conspecific K2P distance, proportion of zero cells in K2P distance matrix, and congruence of neighbour joining trees (clade composition and clade composition shallow).**

| <b>Fragment length/name</b> | <b>Position</b> | <b>K2P dist</b> | <b>Zero non con dist</b> | <b>Zero dist</b> | <b>Clade comp</b> | <b>Clade comp shallow</b> |
|-----------------------------|-----------------|-----------------|--------------------------|------------------|-------------------|---------------------------|
| Fragment100_a               | 87              | 0.295           | 0.0714                   | 0.00298          | 0.652             | 0.966                     |
| Fragment100_b               | 152             | 0.282           | 0.0800                   | 0.00300          | 0.618             | 0.954                     |
| Fragment110_a               | 84              | 0.277           | 0.0714                   | 0.00296          | 0.644             | 0.966                     |
| Fragment110_b               | 149             | 0.278           | 0.0686                   | 0.00291          | 0.647             | 0.966                     |
| Fragment120_a               | 84              | 0.278           | 0.0714                   | 0.00295          | 0.658             | 0.966                     |
| Fragment120_b               | 154             | 0.281           | 0.0600                   | 0.00288          | 0.681             | 0.966                     |
| Fragment130_a               | 85              | 0.278           | 0.0714                   | 0.00296          | 0.647             | 0.966                     |
| Fragment130_b               | 150             | 0.274           | 0.0600                   | 0.00287          | 0.670             | 0.966                     |
| Fragment140_a               | 84              | 0.270           | 0.0714                   | 0.00291          | 0.655             | 0.966                     |
| Fragment140_b               | 155             | 0.270           | 0.0600                   | 0.00288          | 0.667             | 0.966                     |
| Fragment150_a               | 84              | 0.271           | 0.0714                   | 0.00291          | 0.695             | 0.966                     |
| Fragment150_b               | 156             | 0.267           | 0.600                    | 0.00290          | 0.667             | 0.966                     |
| Fragment160_a               | 84              | 0.270           | 0.0714                   | 0.00290          | 0.687             | 0.977                     |
| Fragment160_b               | 132             | 0.268           | 0.0571                   | 0.00280          | 0.684             | 0.971                     |
| Fragment170_a               | 83              | 0.264           | 0.0714                   | 0.00287          | 0.695             | 0.971                     |

|               |     |       |        |         |        |       |
|---------------|-----|-------|--------|---------|--------|-------|
| Fragment170_b | 131 | 0.263 | 0.0571 | 0.00278 | 0.690  | 0.971 |
| Fragment180_a | 81  | 0.264 | 0.0714 | 0.00287 | 0.698  | 0.971 |
| Fragment180_b | 126 | 0.264 | 0.0571 | 0.00277 | 0.693  | 0.971 |
| Fragment190_a | 82  | 0.262 | 0.0600 | 0.00278 | 0.698  | 0.971 |
| Fragment190_b | 115 | 0.264 | 0.0543 | 0.00270 | 0.684  | 0.971 |
| Fragment200_a | 85  | 0.262 | 0.0486 | 0.00273 | 0.716  | 0.977 |
| Fragment200_b | 113 | 0.264 | 0.0429 | 0.00264 | 0.707  | 0.977 |
| Fragment210_a | 88  | 0.270 | 0.0486 | 0.00273 | 0.718  | 0.977 |
| Fragment210_b | 111 | 0.268 | 0.0429 | 0.00264 | 0.716  | 0.977 |
| Fragment220_a | 87  | 0.269 | 0.0486 | 0.00272 | 0.716  | 0.978 |
| Fragment220_b | 110 | 0.269 | 0.0429 | 0.00262 | 0.713  | 0.977 |
| Fragment230_a | 85  | 0.265 | 0.0486 | 0.00272 | 0.710  | 0.971 |
| Fragment230_b | 109 | 0.266 | 0.0429 | 0.00260 | 0.0716 | 0.977 |

---
