# Supplementary material for: The design and testing of mini-barcode markers in marine lobsters
Source: PubMed Central journal article supplement (PMC6345471; doi:10.1371/journal.pone.0210492), 2019-01-24
Supplement: pone.0210492.s006.pdf [file pone.0210492.s006.pdf]

**S6 Table. Summary statistics for comparison trees of all 28 fragments. K-scores and Robinson-Foulds (R-F) scores are used to identify best comparison trees. Each score is ranked based on the dataset in ascending order.**

| <b>Comparison tree</b> | <b>Position</b> | <b>K-score</b> | <b>Scale factor</b> | <b>R-F score</b> | <b>K-score rank</b> | <b>R-F score rank</b> |
|------------------------|-----------------|----------------|---------------------|------------------|---------------------|-----------------------|
| Fragment100_a          | 87              | 2.01237        | 0.76807             | 376              | 25                  | 25                    |
| Fragment100_b          | 152             | 2.11378        | 0.12715             | 362              | 28                  | 24                    |
| Fragment110_a          | 84              | 1.83492        | 1.37474             | 340              | 15                  | 20                    |
| Fragment110_b          | 149             | 2.04018        | 0.12333             | 356              | 27                  | 22                    |
| Fragment120_a          | 84              | 1.93939        | 0.55600             | 360              | 22                  | 23                    |
| Fragment120_b          | 154             | 1.90771        | 0.26661             | 336              | 20                  | 19                    |
| Fragment130_a          | 85              | 1.90815        | 0.21935             | 336              | 21                  | 19                    |
| Fragment130_b          | 150             | 1.95615        | 0.16101             | 344              | 23                  | 21                    |
| Fragment140_a          | 84              | 1.98095        | 0.27977             | 328              | 24                  | 16                    |
| Fragment140_b          | 155             | 1.84495        | 0.58261             | 318              | 17                  | 15                    |
| Fragment150_a          | 84              | 1.88476        | 0.16584             | 334              | 19                  | 18                    |
| Fragment150_b          | 156             | 1.67155        | 0.54366             | 308              | 9                   | 12                    |
| Fragment160_a          | 84              | 2.02150        | 0.13397             | 316              | 26                  | 14                    |
| Fragment160_b          | 132             | 1.72608        | 0.57789             | 296              | 14                  | 9                     |
| Fragment170_a          | 83              | 1.85863        | 0.18692             | 330              | 18                  | 17                    |
| Fragment170_b          | 131             | 1.71813        | 0.25365             | 312              | 13                  | 13                    |
| Fragment180_a          | 81              | 1.67349        | 0.56663             | 304              | 10                  | 10                    |
| Fragment180_b          | 126             | 1.56501        | 0.88654             | 276              | 5                   | 5                     |

|                      |            |                |                |            |          |          |
|----------------------|------------|----------------|----------------|------------|----------|----------|
| Fragment190_a        | 82         | 1.84444        | 0.23458        | 306        | 16       | 11       |
| Fragment190_b        | 115        | 1.59154        | 1.00567        | 264        | 8        | 2        |
| Fragment200_a        | 85         | 1.69298        | 0.61303        | 284        | 11       | 8        |
| Fragment200_b        | 113        | 1.70125        | 0.88842        | 270        | 12       | 4        |
| Fragment210_a        | 88         | 1.57009        | 0.77518        | 270        | 6        | 4        |
| Fragment210_b        | 111        | 1.56155        | 0.82888        | 282        | 4        | 7        |
| Fragment220_a        | 87         | 1.51802        | 0.75945        | 278        | 3        | 6        |
| Fragment220_b        | 110        | 1.51785        | 0.80795        | 278        | 2        | 6        |
| Fragment230_a        | 85         | 1.58463        | 0.76811        | 266        | 7        | 3        |
| <b>Fragment230_b</b> | <b>109</b> | <b>1.47431</b> | <b>0.84953</b> | <b>258</b> | <b>1</b> | <b>1</b> |

---
