# Supplementary material for: The design and testing of mini-barcode markers in marine lobsters
Source: PubMed Central journal article supplement (PMC6345471; doi:10.1371/journal.pone.0210492), 2019-01-24
Supplement: pone.0210492.s007.pdf [file pone.0210492.s007.pdf]

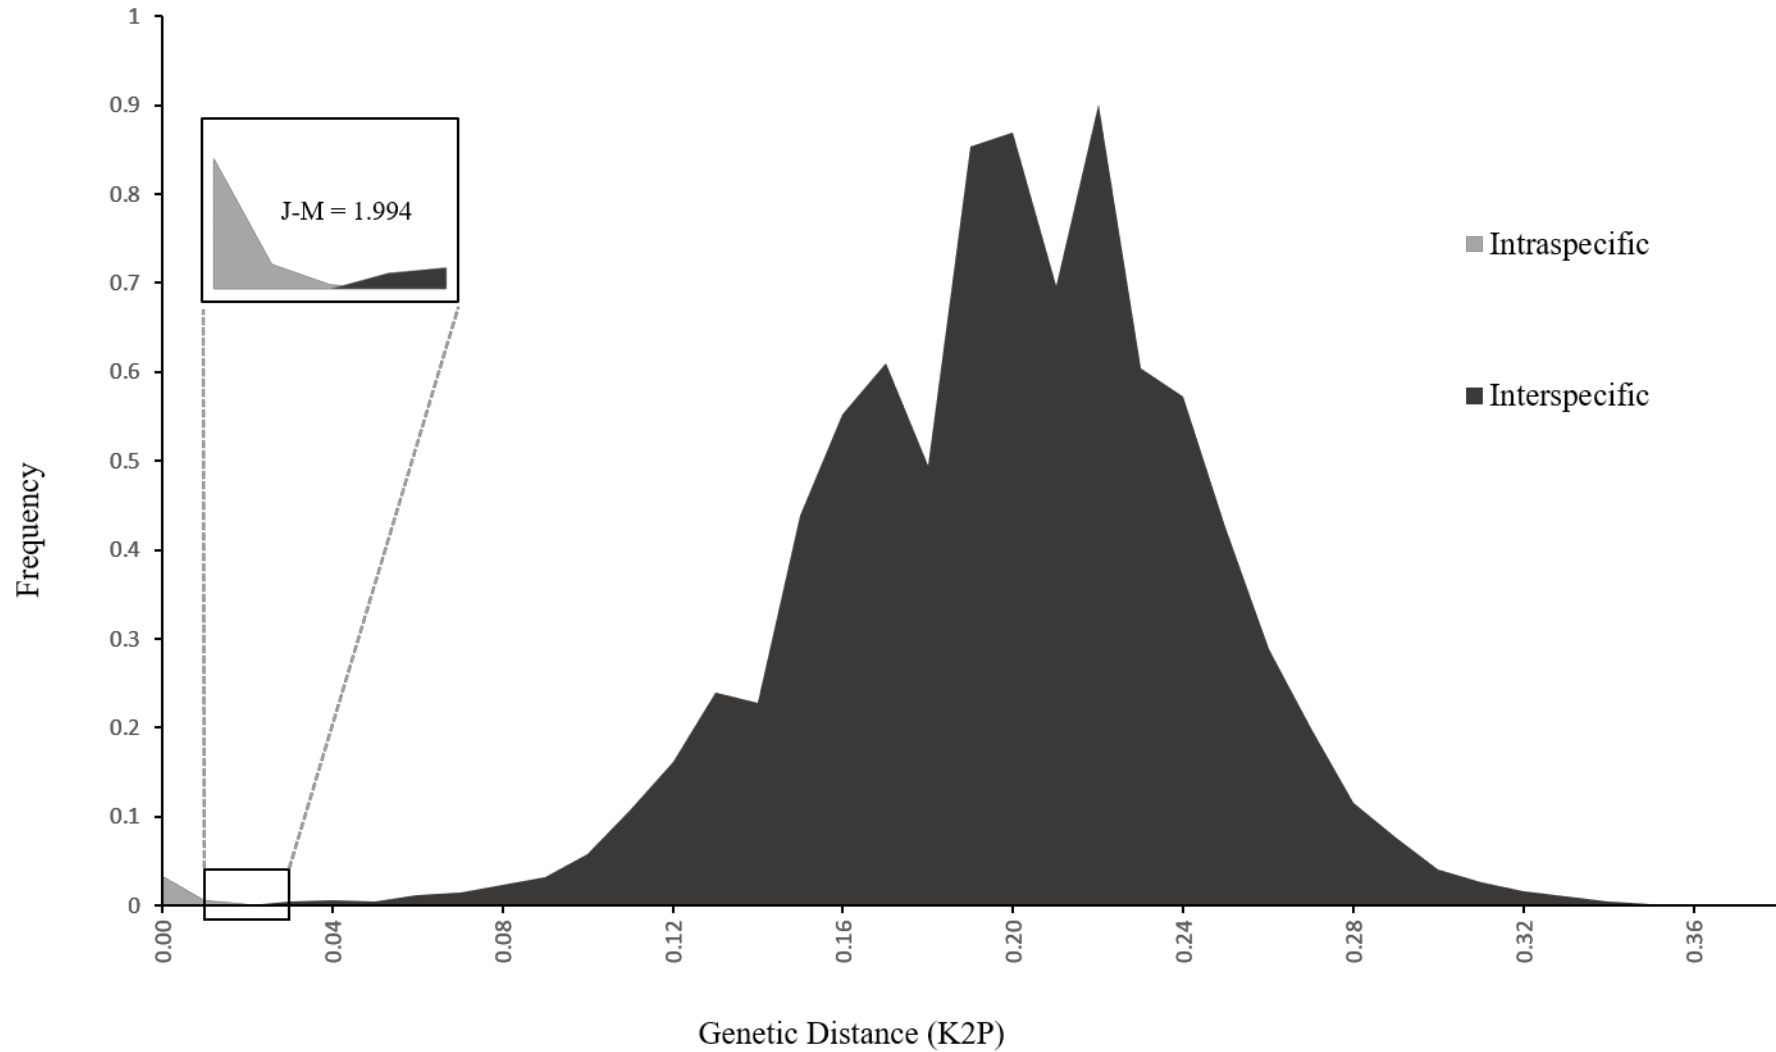

**S7 Fig.** Frequency distribution of intra- and interspecific pairwise K2P distances calculated using the selected mini-barcode region (Fragment 230\_b). The barcode gap (insert) lies between the genetic distances of 0.02 and 0.03.
