# Supplementary material for: The design and testing of mini-barcode markers in marine lobsters
Source: PubMed Central journal article supplement (PMC6345471; doi:10.1371/journal.pone.0210492), 2019-01-24
Supplement: pone.0210492.s010.pdf [file pone.0210492.s010.pdf]

**S10 Table. Summary of amplification and sequencing results for each primer pair. PCR products that showed a single sharp band of correct size were sent for sequencing. Sequences were then BLASTed. Blast search results, identification % and E-value were recorded.**

| <b>Primer Pair</b>     | <b>Sample</b> | <b>Blast top hit</b>     | <b>Identification %</b> | <b>E-value</b>   |
|------------------------|---------------|--------------------------|-------------------------|------------------|
| <b>LobsterMiniBarF</b> | Adult 1       | <i>Panulirus homarus</i> | 97%                     | 7e-80            |
|                        | Adult 2       | <i>Panulirus homarus</i> | 96%                     | 4e-82            |
| +                      |               |                          |                         |                  |
| <b>LobsterMiniBarR</b> | Phyllosoma 1  | <i>Panulirus homarus</i> | 93%                     | 3e-74            |
|                        | Phyllosoma 2  | <i>Panulirus homarus</i> | 92%                     | 5e-71            |
| <b>LCO1490</b>         | Adult 1       | <i>Panulirus homarus</i> | 96%                     | 0.0              |
|                        | Adult 2       | <i>Panulirus homarus</i> | 97%                     | 0.0              |
| +                      |               |                          |                         |                  |
| <b>HCO2198</b>         | Phyllosoma 1  | <i>Panulirus homarus</i> | 97%                     | 0.0              |
|                        | Phyllosoma 2  | No amplification         | No amplification        | No amplification |
| <b>UniMinibarF1</b>    | Adult 1       | Multiple bands           | No amplification        | No amplification |
|                        | Adult 2       | Multiple bands           | No amplification        | No amplification |
| +                      |               |                          |                         |                  |
| <b>UniMinibarR1</b>    | Phyllosoma 1  | No amplification         | No amplification        | No amplification |

|                  |              |                          |                  |                  |
|------------------|--------------|--------------------------|------------------|------------------|
|                  | Phyllosoma 2 | No amplification         | No amplification | No amplification |
|                  | Adult 1      | Multiple bands           | No amplification | No amplification |
| <b>MICOLintF</b> | Adult 2      | <i>Panulirus homarus</i> | 99%              | 5e-148           |
| +                | Phyllosoma 1 | No amplification         | No amplification | No amplification |
| <b>HCO2198</b>   | Phyllosoma 2 | No amplification         | No amplification | No amplification |
|                  | Adult 1      | Multiple bands           | No amplification | No amplification |
| <b>MICOLintR</b> | Adult 2      | <i>Panulirus homarus</i> | 99%              | 5e-148           |
| +                | Phyllosoma 1 | No amplification         | No amplification | No amplification |
| <b>LCO1490</b>   | Phyllosoma 2 | No amplification         | No amplification | No amplification |
